# Supplementary material for: Solar radiative transfer in Antarctic blue ice: spectral considerations, subsurface enhancement, and inclusions
Source: Copernicus journal article supplement (doi:10.5194/tc-2019-114), 2019-05-29
Supplement: Supplementary file [file tc-2019-114-AC2-supplement.pdf]

We thank both reviewers for the time they have taken to review this manuscript and their useful and constructive comments. It is most appreciated. Below the reviewers' comments are in *italics*, followed by the authors' responses in roman text, and locations of specific changes in the revised manuscript (where not already obvious) follow in [square brackets].

#### **RC1: Reviewer #1**

*Major comment:*

*The word “inclusions” in the title refers to meteorites hidden just below the ice surface in the Antarctic blue-ice areas, where the searches for meteorites have been carried out for many years. As the authors say in their Introduction, they aim to improve the calculation of “the vertical movement of meteorites through blue ice”. The paper would be much more interesting with a little more work, in fact far less work than the examination of different cloud properties described in the Supplement, which was of minor importance. The paper uses Monte Carlo modeling to compute the radiation absorbed by a meteorite in ice, but then stops just before coming to interesting answers on such questions as (1) How far down below the surface will a meteorite travel in the ice before it stops, as a function of the radius of the meteorite and the incident solar flux? The ice is typically ablating at ~5 cm/year; can the downward-migrating meteorite outrun the sublimation front? (2) Many meteorites are found on the surface, not melting down into the ice. Is this because they are small enough that the heat from their absorbed radiation is quickly conducted away? These are questions for which the Monte Carlo method is eminently suitable. With just a small additional effort these questions could be addressed. Values of rock density, rock albedo, and thermal conductivity of ice are readily available.*

We appreciate the reviewer 1's thoughts on this point. This is exactly the core problem we are studying in the wider project, towards which the present study forms an important step. In more detail, our “Lost Meteorites of Antarctica” project is investigating the causes of relative deficiency of iron meteorites in Antarctica, and we have hypothesized whether they might be hidden in a sparse layer below the surface (some 10's of cm below the surface) — a preliminary study was published as Evatt et al., 2016. Following this earlier study a reconnaissance field trip was completed last Austral summer, with the main expedition now in its final planning stages. The hypothesized mechanism is near surface solar heating of the englacial meteorites embedded within upwelling ice flows, and to improve the modelling part of the work we required to better understand the profile of solar absorption by the ice, and the solar radiation available to be absorbed by the meteorites. However the improved modelling work itself is a substantial study — it is not trivial to apply a full 3D free boundary problem — and it could not be done proper justice by inserting an extra section in this current manuscript. It is the subject of a PhD thesis at present and we anticipate a separate manuscript on the meteorite sinking mechanism and its dependencies on their physical properties and dimensions in due course.

--

*Minor comments:*

*page 5 line 2. Change Muller to Mullen.*

Changed [p5, l5].

--

*page 6 line 21. “with the dependent variable, the asymmetry parameter  $g$ ”. Henyey-Greenstein is a one-parameter phase function, whose parameter is  $g$ ; so  $g$  is not a “dependent variable”. You can just delete the three words “the dependent variable”.*

Changed as suggested. [p6, l24]

--

page 8 lines 12-13. "enhancement of the incident irradiance under cloudy skies from an albedo feedback mechanism." Change "from an albedo feedback mechanism" to "by multiple reflection between cloud and ground".

Changed as suggested. [p8, l17]

--

page 10 lines 11-12. These three albedo values (51.6, 62.1, 60.5%) should also be included in Table 1.

Added to table 1 as suggested. [Table 1, additional column]

--

page 14, Eq. (9). Say that the units of  $d$  are meters.

Clarification added.[p14, l8]

--

Figure 6a. On the bars at the top, what do the two different colours indicate (blue versus grey)?

We are unsure to what the reviewer is referring at this point. The only 'bar' that appears in figure 6a indicates the highlighted area shown in figure 6b, this is described in the figure caption. In our copy this appears grey, but perhaps it is due a rendering issue.

--

Supplement page 1 line 16. "the results for a diffuse sky lies close to the 69° result". I don't see this in Figure S1a; the diffuse sky looks closer to the 49° result.

We thank the reviewer for pointing out this typographical oversight: the diffuse result lies closer to that for a solar zenith angle of 49°. We have amended the text. [Supp. p1, l16]

--

Figure S1b is unrealistic for the large values of SZA. Even if you ignore diffuse radiation, at SZA=89° the surface roughness present on all blue-ice areas causes the angle of incidence on sunlit surfaces to be considerably less than 89°. I suggest removing the curves for 79 and 89 degrees

Although our study is idealised in its assumption of a planar surface, even for a roughened / suncupped surface, there will be facets where the incident angle is glancing and approaches 89°. Admittedly these will be small fraction of the total, but the authors feel including the 89° result more clearly demonstrates the impact of differing SZAs, and moreover the need to account for both diffuse and direct components of the incident spectrum (fig S1a vs S1c, fig S1b vs S1d). We have amended the text in light of the reviewer's point. [Supp. p1, l15-16]

## RC2: Reviewer #2

*This paper validates a Monte Carlo method to track photons to calculate reflection and transmission of radiation into Antarctic blue ice. While using the MC method for tracking photons is not exactly new, the authors have made it interesting and relevant by discussing the inclusions of inclusions, such as meteorites. Here I agree with the review of S. Warren, that the study would be much more interesting and novel if the results of the downward movement of those inclusions would be quantified and discussed. As suggested by S. Warren, and considering that many meteorites are found on the surface of the blue ice areas, there either must be some sort of size/material threshold beyond which the inclusions won't melt into the ice and experience a downward motion, or they are melting much slower than the sublimation in those areas. I would like to see these questions and the questions by S. Warren addressed in a revision, which would make this work more interesting and applicable.*

We refer reviewer 2 to our first response to reviewer 1 on this point. In short, the present study is preparatory work for modelling on this exact problem where we are developing the model of Evatt et al, 2016, and carrying field campaigns to test our hypothesis. Unfortunately we do not feel an adequate description of those methods, nor a full discussion of the results, could be fitted into an additional section in this manuscript.

--

*General comments:*

- *Considering that the authors have used the morphological data from Dadic et al. 2013, it would be interesting to see how their results compare to the measured albedos from the same dataset, especially for the validation part. This is particularly relevant because we found that our SSA (bubble size and number density) differs if estimated from Micro-CT (or through the caliper measurements of density) or from the measured albedos and the model.*

We found that our results lay lower than the albedos measured by Dadic et al. This is noted at p10, ll16-17 in the original manuscript. [p10, ll19-21]

--

- *P5, L12: I am not convinced that the approach of "homogenization" of our morphological measurements the best solution here. I like that the authors used the "no cracks" data for an upper bound for density, but I think to get a more representative sample, it would have been better to use the lowest density for blue ice for the lower bound, instead of taking means of the data.*

Our homogenisation exercise was intended to extract a set of parameters representative of "typical" blue ice, whilst also drawing out parameter estimates for samples with high and low densities. Though the Dadic et al. dataset was exceedingly useful in this regard, we were keen not to rely on a single study location (Allan Hills), to ensure that our results were widely applicable to blue ice areas. For this reason we also incorporated results from the wider literature to construct the upper and lower datasets. The no cracks dataset stands slightly separate from the other three parameter sets in that it is less likely that blue ice of that density would exist in a large bulk sample (no cracks existing for several metres), and thus we consider it an outer bound. In contrast the mean, upper and lower parameter sets aim to capture the range of typical blue ice properties.

--

- *Albedo is usually not given in percent, but as a dimensionless number between 0-1. This should be adjusted, unless there is a particular reason to keep it as a percent.*

Albedos have been changed to dimensionless numbers. [p5, ll14-21]

--

- *Generally I found it hard to follow the conclusions from the figures. The figures are referenced, but I often couldn't see where the conclusion is coming from. That could be improved.*

We have reviewed the text in light of this suggestion, making clarifications where appropriate.

--

- *P2, L23-25: The distinction between snow and firn here is vague and incorrect. Snow starts recrystallizing as soon as it falls, so this distinction is invalid. I suggest either using snow or firn.*

We take the reviewer's point that there is a gradation between snow and firn and ice, and have rephrased this sentence to clarify this point. [p2, ll23-26]

--

- *P2, L26: Sea ice also has brine, which has different optical properties than air bubbles.*

This point has been added. [p2, ll28-29]

--

- P2, L28, *This sentence doesn't make sense. Blue ice is formed the same way as glacial ice, which is formed through compression of snow. It's blue because its surface is sublimating and not melting.*

This has been corrected. [p2, l29]

--

- P3, L19-20: *This is entirely true. The studies by Mullen and Warren, Light 2003, and Dadic et al. 2013 (studies cited in this paper, and there are probably other studies as well) describe exactly that: spectral albedos and radiative transfer derived from the interaction of solar radiation and embedded bubbles. This sentence should be rephrased: maybe add "by direct ray tracing"?*

We have clarified the text at this point. [p3, ll21-22]

--

*Maybe you could also reference Tancrez and Taine 2004 (Direct identification of absorption and scattering coefficients and phase function of a porous medium by a Monte Carlo technique), Haussener et al. 2012 (Determination of the macroscopic optical properties of snow based on exact morphology and direct pore-level heat transfer modeling) and Farmer and Howell 1998 (Comparison of Monte Carlo Strategies for Radiative Transfer in Participating Media). I'm sure they are others as well.*

We thank the reviewer for the suggestions, and have included a reference to Haussener et al. 2012. [p3, l18]

--

- P8-9: *I can't see the enhancement in Figure 4. Please clarify.*

This has been clarified in the caption of figure 4.

--

- P8, L3: *If you assume that bubble geometry is spherical, why do you discuss the asymmetry factor? I appreciate that it is acknowledged, but it takes a whole figure (Figure 2), which has no relevance to this manuscript.*

As in Mullen and Warren 1988, here we assume spherical bubbles, and from Mie Theory the asymmetry factor is therefore a function of wavelength (shown in fig. 2). The relevance is that the asymmetry parameter controls the scattering and overall path length of a photon within the ice, and hence acts as a fundamental control on the spectral volume scattering, albedo, and attenuation of solar radiation within the ice. As our study is based upon understanding these radiative processes in blue ice and distilling this into a simple mathematical model, we feel it is useful to show the complex variation exhibited by the asymmetry parameter that might otherwise be overlooked by a reader less versed in radiative theory.

--

- P10, L9-10 (also in Conclusion and Discussion): *I am not sure why a change of albedo from 0.29-0.52 is referred to as "only", and that the albedo is "insensitive" to the scattering coefficient. Small changes in albedo can have a profound effect on the Earth's energy balance. E.g. Pierrehumbert et al. [2011] showed that a change of ice albedo from 0.55 to 0.65 means a factor-of-10 increase in the CO2 mixing ratio required to end the Snowball Earth state. I would like to see this rephrased in the manuscript.*

This has been clarified in the manuscript. The point we were making is that even for the most sensitive wavelengths the spectral albedo changes less than might be expected given the large change in scattering coefficient — and for shorter and longer wavelengths there is less dependence still. Consequently the broadband albedo is relatively insensitive. This is a slightly different issue than

its importance in the Earth's energy balance, on which we wholly agree with the reviewer. [p10, ll10-14]

--

• *P10, L18 (also conclusions): It's not exactly a new finding that ice is most reflective in the blue wavelengths, and I'm not sure why this is one of the conclusions. E.g. See Warren et al. 2019 (Green icebergs revisited) and the references therein.*

While it is not a new result per se, it provides further validation of the model. It could be that the model results showed a high albedo throughout the visual wavelength range, but it did not. We include this paragraph because it is often not appreciated how spectral radiometric and visual responses relate, how the colour of blue ice is manifested by way of the scattering and absorption processes, or that the perceived colour saturation relates to the scattering coefficient — and as such we believe it is useful to highlight these points in the text.

--

• *P14, L15-20: See Haussener et al. 2012 for direct ray tracing in a real geometry.*

We have added a reference to Haussener et al 2012 at the appropriate point in the text. [p14, ll25-26]

--

• *P14, L29-31: see comment above about the "insensitivity" of the albedo to scattering. Considering that the albedo is between 0-1, it can't be expected that even a fourfold increase in the scattering coefficient would cause a fourfold increase in albedo (which would bring the albedo to above 1). Again, this should be discussed in relative importance of the changes in albedo.*

We refer the reviewer to our response to his earlier comment. The relevant sentences in the summary have been rephrased accordingly. [p15, ll4-7]

--

• *P15, L1-3: again, not a novel conclusion and relevant papers should be referenced.*

In a similar vein to our comments on the visual response, it bears repeating that there are two physical processes that give rise to the albedo: photons do not enter the ice and are reflected by the surface and those that enter the ice, and are scattered before being transmitted upwardly back to the atmosphere. In part this is a validation of the model (newly applied to blue ice); in any event the differing spectral contributions of these two processes is often underappreciated.

--

• *P15, L17: Can the main results from Section three be explicitly repeated here, otherwise the reader has to go back through that section.*

This sentence has been rephrased to make it clear which part of the results are being referenced. [p15, l23]

--

• *P15, L17-19: Again, I disagree that there is only a moderate dependence of radiative properties on the zenith angle and bubble parameters. Please have a look at this again.*

We refer to the reduced dependence on solar zenith angle when both direct and diffuse components are considered, and the relatively small dependence (given the range of locations explored) on environmental conditions. The dependence on bubble parameters refers to the mean, upper and lower parameter sets which are intended to represent typical blue ice (that is, excluding the 'no cracks' parameter set). This has been clarified at the appropriate point in the manuscript. [p15, ll24-25]

--

• *Figure 2 can be removed. It doesn't really contribute more than when Mullen and Warren 1998 are referenced.*

See note above on figure 2.

--

• *Figure 3: I can't see how this Figure is different from Light et al. 2003. I also can't see any difference between figures a) and b). Maybe to make it relevant, you could instead plot the differences between 3a) and 3b) and then discuss the differences.*

Figure 3a and 3b shows the model validations for a conservative non-refractive slab and a conservative refractive slab respectively. The difference between them can be seen most clearly by examining the lower left hand part of each plot for the  $g_{HG} = 0.00$  curves. The solid curves are the four stream results as presented by Light et al (and should therefore be identical to those shown in their figure). The individual points are our Monte Carlo results — the good agreement demonstrates that our model is working as expected, and hence the reviewer is correct in noting that our figure 3 looks like the equivalent figure in Light et al.

--

• *Figure 7: Same here, I think to see what the authors are discussing, it would be more helpful to plot the difference between 7a and 7b, otherwise it's hard to draw any conclusions.*

Whilst we present results for the two particular geometries of inclusion, our focus in the text is on the how the fractional irradiance varies with depth and size, rather than the differences between spheres and planes. As such our preference is to show each separately which better aligns with our discussion.
